## Disruption of Folate and Vitamin B<sub>12</sub> Metabolism in Aged Rats Following Exposure to Nitrous Oxide

Donald D. Koblin, Ph.D., M.D.,\* Barbara W. Tomerson, M.S.,† Frederic M. Waldman, M.D., Ph.D.‡

The ability of nitrous oxide (N<sub>2</sub>O) to disrupt folate and vitamin B<sub>12</sub> metabolism was examined in young (2-month), middle-aged (12-month), and elderly (24-month) Fischer 344 rats. Abnormalities in folate metabolism were assessed in a noninvasive manner by measuring the urinary excretion of formic acid and formiminoglutamic acid (FIGLU), compounds that are elevated in the urine of mammals with a deficiency in folate. After a 6-h exposure to 60% N<sub>2</sub>O/40% O<sub>2</sub>, urinary formic acid excretion increased 3- to 25-fold the first day following N<sub>2</sub>O exposure and returned to background levels by the second day after exposure in all age groups. Urinary FIGLU excretion increased 100- to 300-fold in the first day following N<sub>2</sub>O exposure, with the highest FIGLU excretion rates found in the elderly rats and the lowest in the young rats. By the second day after N<sub>2</sub>O exposure, FIGLU excretion rates returned to baseline levels in all age groups. Plasma folate progressively decreased with increasing age, whereas no age-dependent changes were observed in red cell folate, liver folate, or plasma vitamin B<sub>12</sub> levels. The elderly rats demonstrated the highest vitamin B<sub>12</sub> content in the liver and the lowest vitamin B<sub>12</sub> content in the kidney compared to the other age groups. Hepatic methionine synthase activities (measured 16-21 days after N<sub>2</sub>O exposure) were elevated in the elderly compared to the middle-aged or young rats, but methionine synthase activities in kidney and brain were not different among the three different age groups. It was concluded that in rats, aging *per se* only slightly influences the disruption of folate metabolism produced by exposure to N<sub>2</sub>O. (Key words: Age factors. Anesthetics, gases: nitrous oxide. Enzymes: methionine synthase. Vitamins: folate, B<sub>12</sub>.)

NITROUS OXIDE (N<sub>2</sub>O) inactivates methionine synthase (EC 2.1.1.13), a vitamin B<sub>12</sub>-dependent enzyme that plays a pivotal role in folate metabolism, in both animals<sup>1-3</sup> and humans.<sup>4,5</sup> Although signs of vitamin B<sub>12</sub> and folate deficiency develop in humans given N<sub>2</sub>O for prolonged periods (days), the clinical significance of N<sub>2</sub>O use for a limited duration remains less certain.<sup>6,7</sup>

The toxic effects produced by N<sub>2</sub>O appear to be greatest in critically ill patients and in those with a pre-existing vitamin B<sub>12</sub> and/or folate deficiency. Critically ill patients given N<sub>2</sub>O for 0.5-6 h develop megaloblastic bone mar-

rows and have an increased mortality rate.<sup>8,9</sup> In patients with subclinical deficiencies of vitamin B<sub>12</sub>, neurologic dysfunction and megaloblastic changes have occurred after routine surgical procedures of approximately 2 h duration in which N<sub>2</sub>O was a component of the anesthetic.<sup>10,11</sup> Furthermore, in a rat animal model, vitamin B<sub>12</sub> deficiency and N<sub>2</sub>O act in a synergistic fashion to retard growth<sup>12</sup> and to impair the use of deoxyuridine in bone marrow.<sup>13</sup> Such observations are consistent with the thought that "sick" individuals and those with deficient or marginal stores of vitamin B<sub>12</sub> might be harmed by N<sub>2</sub>O exposure.

The elderly may constitute another subpopulation of patients susceptible to the inactivation of methionine synthase by N<sub>2</sub>O. Elderly patients are often debilitated and tend to have deficiencies in vitamin B<sub>12</sub> or folate, with the incidence of subnormal values of these vitamins being as high as 25% in patients over 60 yr of age.<sup>14-17</sup> Such findings would appear to invite an examination of the role of aging *per se* on the disruption of folate metabolism after exposure to N<sub>2</sub>O. However, variables such as diet, vitamin and mineral intake, disease processes, medications, duration of anesthesia, and type and extent of surgery are difficult to control in the perioperative period, and moreover, tissue biopsies required for certain measurements of folate status are difficult to obtain in patients because of ethical and practical reasons. Therefore, in the current study, we used the Fischer 344 rat, a rodent model extensively used in research on aging,<sup>18</sup> to examine the combined influence of age and N<sub>2</sub>O on folate metabolism.

The disruption of folate metabolism in rats was noninvasively assessed by measuring the excretion of formic acid and formiminoglutamic acid (FIGLU) in urine. Increased urinary excretion of these compounds has been found in young rats exposed to N<sub>2</sub>O,<sup>19,20</sup> presumably due to a N<sub>2</sub>O-induced depletion of free tetrahydrofolate that is required for the further metabolism of formic acid and FIGLU (fig. 1). In addition, blood and tissues were analyzed for folate and vitamin B<sub>12</sub> levels and methionine synthase activities in rats of different ages. Our hypothesis was that the older animals would exhibit a relative deficiency in folate and vitamin B<sub>12</sub>, have lower methionine synthase activities, and demonstrate an enhanced and prolonged excretion of urinary formic acid and FIGLU after exposure to N<sub>2</sub>O when compared to the younger animals.

\* Associate Professor in Residence of Anesthesia.

† Biological Laboratory Technician.

‡ Assistant Professor in Residence of Laboratory Medicine.

Received from the Department of Anesthesia, Veterans Administration Medical Center, and the Departments of Anesthesia and Laboratory Medicine, University of California, San Francisco, California. Accepted for publication April 16, 1990. Supported in part by NIA Grant PO1 AG3104, by a Merit Review Grant from the Veterans Administration, and by a grant from the Academic Senate of the University of California at San Francisco.

Address reprint requests to Dr. Koblin: Anesthesiology Service (129), Veterans Administration Medical Center, 4150 Clement Street, San Francisco, CA 94121.

## Materials and Methods

These experiments were approved by the Animal Studies Subcommittee at the Veterans Administration Medical Center, San Francisco. Male Fischer 344 rats (National Institute of Aging colonies, Indianapolis, IN) of three different ages (2-month [young], 12-month [middle-aged], and 24-month [old or elderly]) were used in these studies. We obtained eight rats in each of the three age groups. The rats were housed in individual plastic metabolic cages (Nalge; 36 cm length × 28 cm width × 52 cm height). The animals were given Purina Rodent Laboratory Chow (Diet #5001, Purina Mills Inc.) and tap water *ad libitum* except during the 6-h period of exposure to N<sub>2</sub>O.

Animals were allowed to adapt to their new surroundings for at least 1 week before the start of the experiments. To obtain background values for the urinary metabolites (formate, FIGLU) and to test for their day-to-day variability, six consecutive 24-h urine samples were collected from each of the animals before N<sub>2</sub>O exposure. The urine collection vials contained 0.2 ml concentrated hydrochloric acid to minimize bacterial growth. After the background urine samples were obtained and frozen, rats were placed into individual, cylindrical, Plexiglass chambers (30 cm in length and 9–10 cm in diameter) with one-holed rubber stoppers at both ends. Plastic connectors inserted into the stoppers and attachment of tygon tubing allowed for the passage of gases. A sampling port attached to a three-way stopcock permitted sampling of chamber gases. Exposures to N<sub>2</sub>O were performed between 0900 and 1500 hours. The chambers were initially flushed with

100% oxygen for more than 2 min, and an inspired mixture of 60% N<sub>2</sub>O/40% O<sub>2</sub> was administered for 6 h. Flow rates per rat were approximately 1 l/min. Gas samples were taken at approximately 90-min intervals from individual chambers during the 6-h exposure and analyzed with a SARA mass spectrometer to confirm the gas concentrations. Chamber CO<sub>2</sub> levels remained below 0.6%. Following the 6-h N<sub>2</sub>O exposure, the chambers were flushed with 100% oxygen for 2 min. After the animals were removed from the N<sub>2</sub>O environment, they were returned to their metabolic cages in room air and again provided with rodent chow and water.

A 17-h urine collection followed the N<sub>2</sub>O exposure period. Twenty-four-hour urine samples were also collected on days 2, 3, 4, and 9 following N<sub>2</sub>O exposure. Sixteen to 21 days following nitrous oxide exposure, the rats were killed with 100% carbon dioxide. Blood was collected from the inferior vena cava using heparin (20 units/ml blood) as the anticoagulant. Livers, kidneys, and brains were isolated from the animals, weighed, and stored at −20°–−30°C. Animal weights at the time of killing ranged from 206–330 g for the young rats, 384–436 g for the middle-aged rats, and 324–422 g for the elderly rats.

One of the 24-month old animals exhibited minimal food and water intake, a urine output of usually < 1 ml/day, and a body weight that was 38% less than its peers; thus, this aged rat was eliminated from the experiment and was not included in the pooled analyses. On autopsy, this rat had a large testicular tumor.

Methionine synthase activity was determined as described previously.<sup>2</sup> Activity was expressed as nanomoles of methionine produced h<sup>−1</sup> · g<sup>−1</sup> of original tissue or as nanomoles methionine produced h<sup>−1</sup> · mg<sup>−1</sup> of protein in the supernatant. Protein content was determined by the method of Lowry *et al.*<sup>21</sup>

Urinary FIGLU was analyzed by a spectrophotometric procedure as specified in Sigma Diagnostics Procedure No. 365-UV. Urinary formic acid was analyzed by the method used for formic acid in serum<sup>22</sup> with the exception that the acetonitrile precipitation step was not necessary for the analysis of urine specimens. Formic acid concentrations do not change when stored at −20° C for up to 6 months,<sup>22</sup> and all of the samples were assayed well within this time period. Excretion rates of FIGLU and formic acid were calculated from the product of the concentration and volume of urine collected over a given time period.

Vitamin B<sub>12</sub> and folate concentrations in plasma, red cell folate concentrations, and vitamin B<sub>12</sub> in liver, kidney, and brain were determined by a radioassay (MAGIC Vitamin B<sub>12</sub> [<sup>57</sup>Co]/Folate [<sup>125</sup>I] No Boil Radioassay, CIBA Corning Diagnostics) that uses purified intrinsic factor for analysis of vitamin B<sub>12</sub>. Vitamin B<sub>12</sub> was extracted

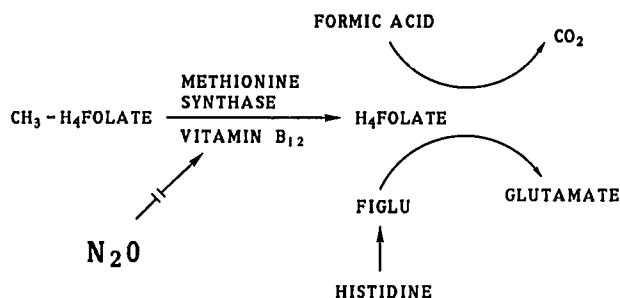

FIG. 1. A simplified scheme to illustrate the buildup of formic acid and formiminoglutamic acid (FIGLU) that occurs after exposure to nitrous oxide. Methionine synthase generates tetrahydrofolate (H<sub>4</sub>FOLATE) from 5-methyltetrahydrofolate (CH<sub>3</sub>-H<sub>4</sub>FOLATE) and in the process converts homocysteine to methionine. Nitrous oxide-induced inactivation of methionine synthase *via* oxidation of the vitamin B<sub>12</sub> cofactor results in relative depletion of tetrahydrofolate. Because tetrahydrofolate is required for the oxidation of formic acid to carbon dioxide and for the further breakdown of FIGLU to glutamate, formic acid and FIGLU levels tend to increase after exposure to nitrous oxide, resulting in an increased urinary excretion of these compounds. A more complete description of vitamin B<sub>12</sub>-folate interrelationships and the metabolic processes involved is provided in reference 44.

from tissues after the method of Kondo *et al.*<sup>23</sup> Folate was extracted from liver after homogenization in 5% (w/v) ascorbate.<sup>24</sup> Supernatants of the tissue extracts were diluted (Immophase B12/Folate 0 Standard, CIBA Corning Diagnostics) to obtain values within the range of the assay standards. A linear response for vitamin B<sub>12</sub> or folate was attained with various dilutions of the supernatants for each of the organs. A low folate/vitamin B<sub>12</sub> control (BioRad) was included in each of the assays. Total tissue contents of vitamin B<sub>12</sub> and folate were calculated from the product of the tissue concentrations of vitamins and the weight of the organs.

Statistical computations were performed by analysis of variance. Error bars associated with mean values indicate  $\pm$  SD. Multiple comparisons were performed using the Newman-Keuls test or its analog when the nonparametric Kruskal-Wallis analysis of variance was used.<sup>25</sup>  $P < 0.01$  was considered statistically significant.

Results

Background excretion rates of urinary formic acid in animals of the three different age groups and a measure of the day-to-day variability in formic acid excretion rates were obtained by six consecutive 24-h urine sample collections (fig. 2). Formic acid excretion rates (in  $\mu\text{g}/\text{h}$ ) tended to be slightly lower in the middle-aged than in the young or old animals. For any given day, however, the

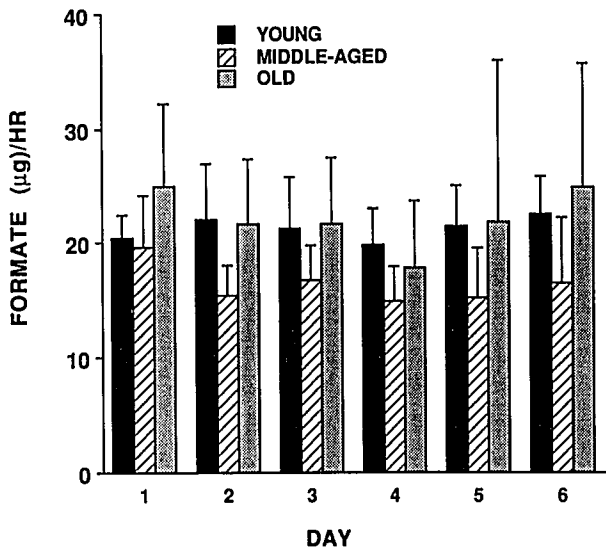

FIG. 2. Urinary formic acid excretion rates in eight young, eight middle-aged, and seven elderly rats in six consecutive 24-h urine samples obtained before exposure of the animals to nitrous oxide. Values are expressed as the total micrograms of formic acid excreted per h (mean  $\pm$  SD). For any given day, formic acid excretion rates (A) were not significantly ( $P < 0.01$ ) different among the young, middle-aged, or old animals. There were no significant day-to-day variations in formic acid levels among any of the three different age groups.

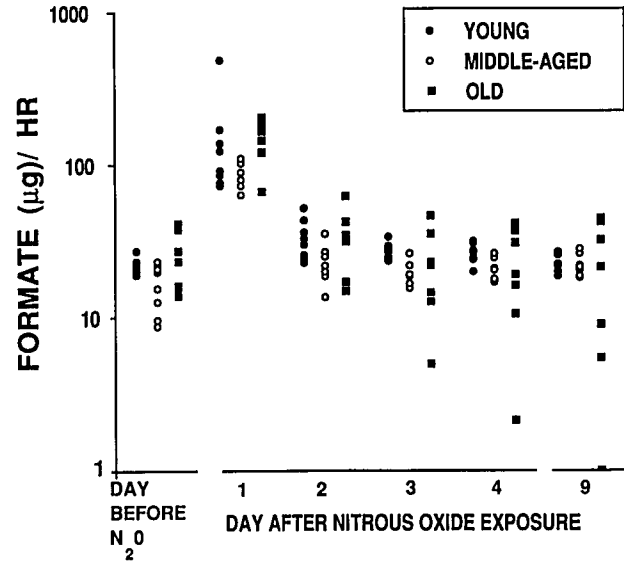

FIG. 3. Urinary formic acid excretion rates in young, middle-aged, and elderly rats on the day immediately before, and on days after exposure to 60% N<sub>2</sub>O for 6 h. Values are expressed as the total micrograms of formic acid excreted per h. Note the logarithmic scale of the ordinates. For each of the time points measured there are eight values for the young and middle-aged rats and seven values for the old rats, although a lesser number of symbols are visualized because some of the points overlap. Data comparison for any given age group at all time points using the Kruskal-Wallis test for nonparametric analysis of variance revealed significantly ( $P < 0.01$ ) elevated formic acid excretion rates for the young and middle-aged rats 1 day after N<sub>2</sub>O exposure compared to the other time points; the formic acid elevations in the elderly rats 1 day after N<sub>2</sub>O exposure compared to background levels of formic acid just failed to reach statistical significance at the  $P < 0.01$  level. Formic acid excretion rates 1 day after N<sub>2</sub>O exposure were not different among the three different age groups.

formic acid excretion rates did not differ significantly among groups. No significant day-to-day variations in formic acid excretion rates were detected in any of the three different age groups.

During the 24-h collection of urine samples at room temperature, the possibility existed that formic acid might be destroyed or produced by bacteria contaminating the urine samples or that formic acid might evaporate from the urine collection chambers that were exposed to room air. To test for these possible artifactual changes, 11 different urine samples were either frozen immediately or allowed to remain at room temperature for 24 h and then frozen. Formic acid concentrations in the samples allowed to remain at room temperature for 24 h were  $100\% \pm 9\%$  ( $\pm$  SD) of the fresh urine samples.

Urinary formic acid excretion rates increased in all three age groups by 3- to 25-fold for the first day following exposure to N<sub>2</sub>O (fig. 3). Age did not influence formic acid excretion rates 1 day after N<sub>2</sub>O exposure. Formic acid excretion rates returned to background levels by the

second day after exposure and remained at the background levels thereafter (fig. 3).

Prior to N<sub>2</sub>O exposure, FIGLU excretion rates in urine were relatively small and did not differ with age. Background FIGLU excretion rates (mean  $\pm$  SD) were  $1.9 \pm 1.9$ ,  $1.6 \pm 2.0$ , and  $4.5 \pm 4.5$  nmol/h in the young, middle-aged, and elderly animals, respectively. Urine collections obtained the day after N<sub>2</sub>O exposure showed marked increases (more than 100-fold) in FIGLU excretion rates, and the elevations in FIGLU excretion rates were highest in the elderly and least in the young rats (fig. 4). The FIGLU excretion rates returned to those near background in all three age groups by the second day after N<sub>2</sub>O exposure (fig. 4).

Methionine synthase activities in liver, kidney, and brain were measured 16–21 days after exposure of rats to N<sub>2</sub>O. Hepatic methionine synthase activities, measured either on the basis of per gram of original tissue (fig. 5A) or per milligram of protein (fig. 5B), were significantly ( $P < 0.01$ ) higher in the elderly as compared to middle-aged or young rats. Methionine synthase activities in kidney and brain did not vary significantly with age (fig. 5).

Plasma concentrations of folate consistently decreased with increasing age of the animals (table 1); however, there were no differences in red cell folate or liver folate (in terms of  $\mu\text{g}$  folate/g liver) among animals of the three different age groups. (The lower amount of total liver folate [in  $\mu\text{g}$ ] in the young animals was related to the lower liver weights in young compared to middle-aged and el-

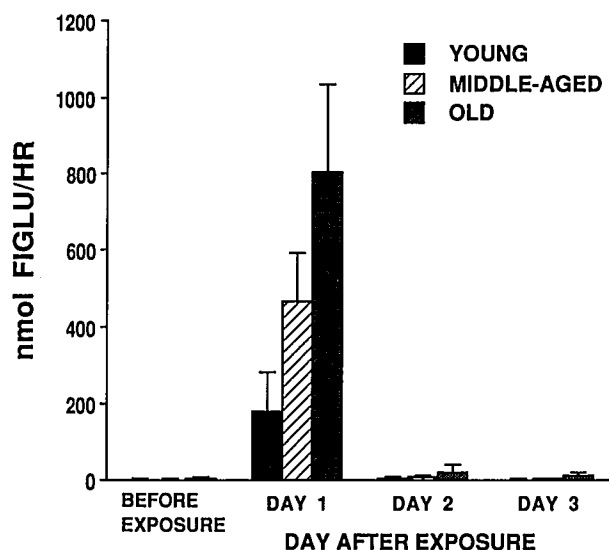

FIG. 4. Urinary FIGLU excretion rates (mean values  $\pm$  SD) in young, middle-aged, and elderly rats on the day immediately before and on days after exposure to 60% N<sub>2</sub>O for 6 h. Values are expressed as the total nanomoles of FIGLU excreted per hour. FIGLU excretion rates differed significantly ( $P < 0.01$ ) in the three different age groups (old  $>$  middle-aged  $>$  young) in the urine collections obtained 1 day after N<sub>2</sub>O exposure.

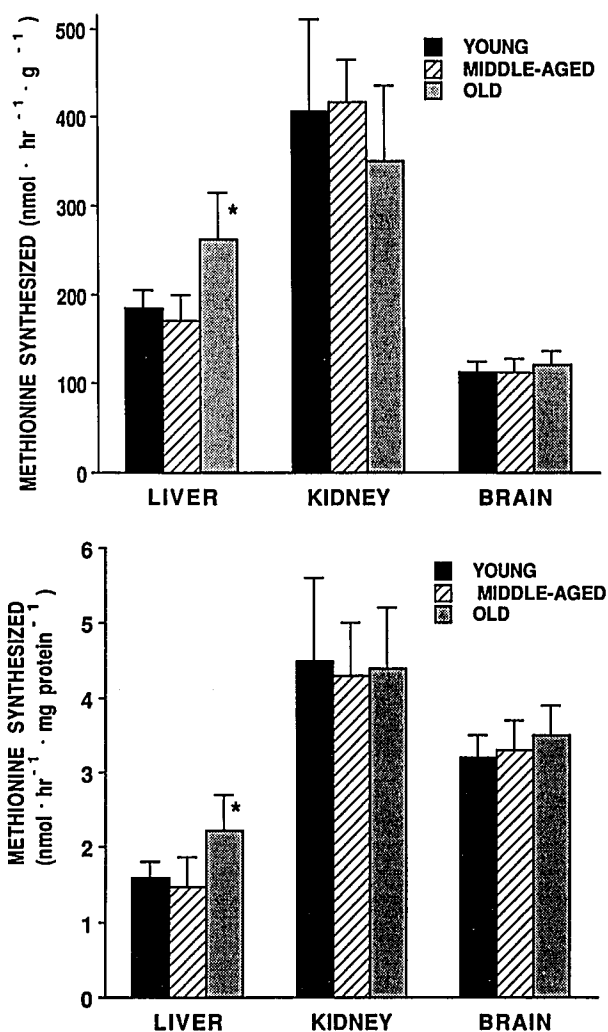

FIG. 5. Methionine synthase activities in livers, kidneys, and brains of young, middle-aged, and elderly rats measured 16–21 days after N<sub>2</sub>O exposure. Activities are expressed as nanomoles of methionine produced  $\cdot \text{h}^{-1} \cdot \text{g}^{-1}$  of original tissue (A) or as nanomoles methionine produced  $\cdot \text{h}^{-1} \cdot \text{mg}^{-1}$  of protein in the supernatant (B) (mean  $\pm$  SD). Liver methionine synthase activities in the elderly animals were significantly higher ( $*P < 0.01$ ) than in the young or middle-aged rats.

derly rats.) Plasma concentrations of vitamin B<sub>12</sub> did not exhibit a consistent trend with age. Similarly, there were no consistent changes in tissue concentrations of vitamin B<sub>12</sub> with age. Hepatic concentrations of vitamin B<sub>12</sub> were highest in the elderly rats, whereas the elderly rats exhibited the lowest concentrations of vitamin B<sub>12</sub> in kidney (table 1). Brain concentrations of vitamin B<sub>12</sub> did not differ among young, middle-aged, and elderly animals.

## Discussion

Using formic acid and FIGLU in urine as indirect markers to characterize alterations in folate metabolism, we found that aging *per se* minimally influences the N<sub>2</sub>O-

TABLE 1. Folate and Vitamin B<sub>12</sub> Concentrations (Mean ± SD)

|                                           | Young       | Middle-Aged | Elderly      |
|-------------------------------------------|-------------|-------------|--------------|
| Folate                                    |             |             |              |
| Plasma (ng/ml)                            | 81.2 ± 8.5  | 67.8 ± 6.4‡ | 50.5 ± 7.4*† |
| Red cell (ng/ml)                          | 278 ± 69    | 268 ± 64    | 297 ± 48     |
| Liver (μg/g)                              | 7.7 ± 0.89  | 8.56 ± 2.04 | 8.73 ± 2.08  |
| Total liver (μg)                          | 92.7 ± 11.6 | 141 ± 34.1‡ | 152 ± 46.0*  |
| Vitamin B <sub>12</sub>                   |             |             |              |
| Plasma (pg/ml)                            | 1220 ± 135  | 954 ± 80‡   | 1090 ± 181   |
| Tissue Vitamin B <sub>12</sub> (ng/g)     |             |             |              |
| Liver                                     | 51.5 ± 10.8 | 42.1 ± 8.2  | 64.2 ± 15.7† |
| Kidney                                    | 1020 ± 252  | 971 ± 188   | 432 ± 217*†  |
| Brain                                     | 32.9 ± 2.6  | 31.7 ± 2.7  | 33.8 ± 3.5   |
| Total Tissue Vitamin B <sub>12</sub> (ng) |             |             |              |
| Liver                                     | 618 ± 123   | 697 ± 146   | 1110 ± 310*† |
| Kidney                                    | 2480 ± 739  | 3080 ± 395  | 1750 ± 714†  |
| Brain                                     | 59.0 ± 7.0  | 62.2 ± 5.2  | 64.3 ± 6.3   |

\* Elderly different from young rats at  $P < 0.01$ .  
† Elderly different from middle-aged rats at  $P < 0.01$ .  
‡ Middle-aged different from young rats at  $P < 0.01$ .

induced perturbation of vitamin B<sub>12</sub> and folic acid metabolic pathways in rats. For all age groups, the marked increases in urinary excretion of formic acid (fig. 3) and FIGLU (fig. 4) that occurred the first day after exposure to N<sub>2</sub>O returned to background excretion rates by the second day after exposure. If a sustained functional deficiency in folate occurred in elderly rats after N<sub>2</sub>O exposure, the markedly increased excretion rates of formic acid and FIGLU would be expected to persist for days after N<sub>2</sub>O exposure. Although the magnitude of the increase in FIGLU excretion rates increased with increasing age the first day after N<sub>2</sub>O exposure (fig. 4), this same trend was not observed with the excretion of formic acid (fig. 3). It remains possible that measurements over shorter time periods (hours) would have revealed a prolonged recovery of urinary excretion rates of FIGLU and formate in the elderly compared to the younger animals.

The elevations of urinary formic acid and FIGLU that occur following exposure to N<sub>2</sub>O and inactivation of methionine synthase are associated with a depletion in H<sub>4</sub>folate (fig. 1). This form of the coenzyme is required for the enzymatic pathways involved in the oxidation of formic acid to carbon dioxide<sup>20</sup> and in the catabolism of FIGLU.<sup>19,26</sup> Exposure of young rats to 50–80% N<sub>2</sub>O for 2 h to 4 days results in a 40–87% depletion in hepatic levels of H<sub>4</sub>folate.<sup>27–31</sup> After young rats are exposed to 50% N<sub>2</sub>O for 4 h and returned to a room air environment, hepatic levels of H<sub>4</sub>folate return to control values within 1–2 days of the recovery period.<sup>27</sup> Although individual tissue folate derivatives were not directly measured in the current experiments, measurements of the urinary FIGLU and formate excretion rates suggest that the time course of alterations in tissue H<sub>4</sub>folate levels after N<sub>2</sub>O

exposure is similar among rats of various ages. Nevertheless, it must be emphasized that these urinary metabolites are only indirect markers of folate status and that other factors can contribute to the excretion of these compounds. For example, excretion of FIGLU in urine is enhanced with increased intake of histidine, and the administration of methionine reduces FIGLU excretion after N<sub>2</sub>O exposure.<sup>19</sup> Thus, it is possible that the differences observed in FIGLU excretion rates between animals of different ages for the first day after N<sub>2</sub>O exposure (fig. 4) were related to age-dependent differences in the dietary intake or absorption of these amino acids.

An unexpected finding in this study was the increase in hepatic methionine synthase activity (but not kidney or brain activities) in elderly compared to middle-aged or young rats (fig. 5). This increase in enzyme activity was apparent when expressed either in terms of original liver weight or in terms of milligrams of protein in the supernatant. Thus, it is unlikely that a simple alteration in the chemical composition of the liver with age could explain the increase in methionine synthase activity in liver in the 24-month-old rats. In previous experiments (using Sprague-Dawley rats), lower hepatic methionine synthase activities were reported in young adult rats compared to weanling rats<sup>32</sup> and in 6-month-old compared to 2-month-old rats.<sup>33</sup> In this latter study,<sup>33</sup> however, rats were switched from a solid diet to a liquid diet at 2 months of age, and the decrease in hepatic methionine synthase activity may have been related to a change in dietary constituents (e.g., methionine<sup>32</sup> or zinc<sup>34</sup>).

Methionine synthase activities were determined 16–21 days after exposure to N<sub>2</sub>O. Since previous studies showed a return of methionine synthase activities to near background levels 1–4 days after acute exposure of young adult rodents to N<sub>2</sub>O,<sup>2,3,23,28,35,36</sup> it is assumed that the 2–3-week time period allowed for complete recovery of enzyme activity. Because of the limited supply and considerable cost of the elderly rats, complete recovery curves (requiring large numbers of animals) of methionine synthase activity after acute exposure to N<sub>2</sub>O were not performed in the current experiments. Although it remains uncertain why a prolonged time (days) is needed for recovery of methionine synthase activity after N<sub>2</sub>O exposure, it is likely that reaction with N<sub>2</sub>O causes irreversible damage to the enzyme and that synthesis of new apoenzyme is needed for recovery.<sup>37,38</sup> The present results, showing a return of urinary FIGLU and formic acid excretion rates to background levels in all age groups within 2 days after N<sub>2</sub>O exposure (figs. 3 and 4), suggest that the recovery of methionine synthase activity in the elderly animals occurs over a time course that is similar to that of the younger rats and that synthesis of new enzyme occurs at similar rates in young and old rats.

Plasma concentrations of folate in the rat (table 1) are

approximately 10 times the values in humans, a finding that is in agreement with the work of other investigators.<sup>39</sup> A progressive decrease in plasma folate concentrations was observed with increasing age of the rats (table 1). However, plasma folate concentrations are considered to be poorly representative of tissue folate stores.<sup>40</sup> Red cell folate and liver folate did not differ among the three age groups (table 1).

The patterns observed in vitamin B<sub>12</sub> status with age depended on the tissue examined. No consistent age-related changes were seen in plasma vitamin B<sub>12</sub> concentrations (table 1). Hepatic content of vitamin B<sub>12</sub> was highest in the elderly animals, whereas kidney concentrations of vitamin B<sub>12</sub> in the elderly rats were approximately one-half of the values in the young and middle-aged rats (table 1). Vitamin B<sub>12</sub> concentrations in the kidney were 7- to 23-fold higher than those found in liver, which is in agreement with previous studies.<sup>41,42</sup> Liver is partially depleted of vitamin B<sub>12</sub> after prolonged exposure of rats to 50% N<sub>2</sub>O<sup>12,23</sup>; however, tissue vitamin B<sub>12</sub> concentrations in the present studies are within the range of control values reported by others,<sup>41,42</sup> indicating that a single 6-h exposure to 60% N<sub>2</sub>O did not markedly reduce the tissue content of vitamin B<sub>12</sub>.

If these results can be extrapolated to the clinical situation, they suggest that aging *per se* only plays a minor role in the toxic effects produced by brief exposures to N<sub>2</sub>O in critically ill patients and those with a pre-existing vitamin B<sub>12</sub> deficiency. Nevertheless, such an extrapolation needs to be interpreted in light of known species differences. A slower rate of methionine synthase inactivation in humans compared to rodents<sup>2,4,5</sup> might imply a lesser susceptibility of humans to N<sub>2</sub>O, but the lower content of hepatic folate in humans compared to rats<sup>43</sup> may enhance the relative toxicity of N<sub>2</sub>O in humans. Furthermore, the limitations of the human studies need to be recognized. Although a high incidence of megaloblastic anemia and mortality was found by Amos *et al.*<sup>8</sup> in critically ill patients who received N<sub>2</sub>O, these studies were not controlled and the same high mortality rate might be found in critically ill patients who undergo anesthesia and surgery and do not receive N<sub>2</sub>O. In addition, only two reports are available<sup>10,11</sup> that associate an exacerbation of a pre-existing vitamin B<sub>12</sub> deficiency with a brief exposure to N<sub>2</sub>O. It is not known how many patients with vitamin B<sub>12</sub> deficiencies receive N<sub>2</sub>O without the production of untoward effects.

In summary, urinary excretion rates of formic acid and FIGLU were measured in 2-month-, 12-month-, and 24-month-old rats before and after a 6-h exposure to 60% N<sub>2</sub>O. Excretion rates of these compounds were markedly elevated during the first day following N<sub>2</sub>O exposure and returned to near background rates of excretion by the second day after exposure in animals of all ages. Thus,

in this animal model, it appears that aging *per se* exerts little influence on the magnitude and time course of the disruption of vitamin B<sub>12</sub> and folate metabolism that occurs after acute exposure to nitrous oxide.

The authors thank John Osterloh, M.D., for his help and advice concerning the assay for formic acid, and Edmond I. Eger II, M.D., for his comments concerning the manuscript.

## References

1. Deacon R, Lumb M, Perry J, Chanarin I, Minty B, Halsey MJ, Nunn JF: Selective inactivation of vitamin B<sub>12</sub> in rats by nitrous oxide. *Lancet* 2:1023-1024, 1978
2. Koblin DD, Watson JE, Deady JE, Stokstad ELR, Eger EI II: Inactivation of methionine synthetase by nitrous oxide in mice. *ANESTHESIOLOGY* 54:318-324, 1981
3. Baden JM, Serra M, Mazze RI: Inhibition of fetal methionine synthetase activity by nitrous oxide. *Br J Anaesth* 56:523-526, 1984
4. Koblin DD, Waskell L, Watson JE, Stokstad ELR, Eger EI II: Nitrous oxide inactivates methionine synthetase in human liver. *Anesth Analg* 61:75-78, 1982
5. Royston BD, Nunn JF, Weinbren HK, Royston D, Cormack RS: Rate of inactivation of human and rodent hepatic methionine synthase by nitrous oxide. *ANESTHESIOLOGY* 68:213-216, 1988
6. Nunn JF: Clinical aspects of the interaction between nitrous oxide and vitamin B<sub>12</sub>. *Br J Anaesth* 59:3-13, 1987
7. Nunn JF: Clinical relevance of the B<sub>12</sub>/N<sub>2</sub>O interaction. *Anaesthesia* 43:587-589, 1988
8. Amos RJ, Amess JAL, Hinds CJ, Mollin DL: Incidence and pathogenesis of acute megaloblastic bone marrow change in patients receiving intensive care. *Lancet* 2:835-839, 1982
9. Amos RJ, Amess JAL, Hinds CJ, Mollin DL: Investigations into the effect of nitrous oxide anaesthesia on folate metabolism in patients receiving intensive care. *Chemothérapie* 4:393-399, 1985
10. Schilling RF: Is nitrous oxide a dangerous anesthetic for vitamin B<sub>12</sub>-deficient subjects? *JAMA* 255:1605-1606, 1986
11. Berger JJ, Modell JH, Sybert GW: Megaloblastic anemia and brief exposure to nitrous oxide—A causal relationship? *Anesth Analg* 67:197-198, 1988
12. Van De List C, Combs M, Schilling RF: Nitrous oxide and vitamin B<sub>12</sub> deficiency interact adversely on rat growth. *J Lab Clin Med* 108:346-348, 1986
13. O'Leary P, Combs MJ, Schilling RF: Synergistic deleterious effects of nitrous oxide exposure and vitamin B<sub>12</sub> deficiency. *J Lab Clin Med* 105:428-431, 1985
14. Craig GM, Elliot C, Hughes KR: Masked vitamin B<sub>12</sub> and folate deficiency in the elderly. *Br J Nutr* 54:613-619, 1985
15. Blundell E, Matthews JH, Allen SM, Middleton AM, Morris JE, Wickramasinghe SN: Importance of low serum vitamin B<sub>12</sub> and red cell folate concentrations in elderly hospital inpatients. *J Clin Pathol* 38:1179-1184, 1985
16. Matthews JH, Clark DM, Abrahamson GM: Effect of therapy with vitamin B<sub>12</sub> and folic acid on elderly patients with low concentrations of serum vitamin B<sub>12</sub> or erythrocyte folate but normal blood counts. *Acta Haematol (Basel)* 79:84-87, 1988
17. Logan RF, Elwis A, Forrest MJ, Lawrence ACK: Mechanisms of vitamin B<sub>12</sub> deficiency in elderly inpatients. *Age Ageing* 18:4-10, 1989
18. Hazzard DG, Soban J: Studies of aging using genetically defined rodents: A bibliography. *Exp Aging Res* 14:59-81, 1988

19. Deacon R, Perry J, Lumb M, Chanarin I: Increased urinary excretion of formiminoglutamic acid in nitrous oxide-treated rats and its reduction by methionine. *Eur J Biochem* 129:627-628, 1983
20. Black KA, Virayotha V, Tephly TR: Reduction of hepatic tetrahydrofolate and inhibition of exhalation of  $^{14}\text{CO}_2$  formed from [dimethylamino- $^{14}\text{C}$ ]aminopyrine in nitrous oxide-treated rats. *Hepatology* 4:871-876, 1984
21. Lowry OH, Rosebrough NJ, Farr AL, Randall RJ: Protein measurement with the folin phenol reagent. *J Biol Chem* 193:265-275, 1951
22. Grady S, Osterloh J: Improved enzymic assay for serum formate with colorimetric endpoint. *J Anal Toxicol* 10:1-5, 1986
23. Kondo H, Osborne ML, Kolhouse JF, Binder MJ, Podell ER, Utley CS, Abrams RS, Allen RH: Nitrous oxide has multiple deleterious effects on cobalamin metabolism and causes decreases in activities of both mammalian cobalamin-dependent enzymes in rats. *J Clin Invest* 67:1270-1283, 1981
24. Stokstad ELR, Reisenauer, Kusano G, Keating JN: Effect of high levels of dietary folic acid on folate metabolism in vitamin B<sub>12</sub> deficiency. *Arch Biochem Biophys* 265:407-414, 1988
25. Zar JH: *Biostatistical Analysis*, second edition. Englewood Cliffs, Prentice-Hall, Inc., 1984
26. Shane B, Stokstad ELR: Folate in the synthesis and catabolism of histidine, Folate and Pterins: Volume 1—Chemistry and Biochemistry of Folate. Edited by Blakley RL, Benkovic SJ. New York, John Wiley & Sons, Inc., 1984, pp 433-455
27. Eells JT, Black KA, Makar AB, Tedford CE, Tephly TR: The regulation of one-carbon oxidation in the rat by nitrous oxide and methionine. *Arch Biochem Biophys* 219:316-326, 1982
28. Black KA, Tephly TR: Effects of nitrous oxide and methotrexate administration on hepatic methionine synthetase and dihydrofolate reductase activities, hepatic folates, and formate oxidation in rats. *Mol Pharmacol* 23:724-730, 1983
29. Makar AB, Tephly TR: The role of formate and S-adenosylmethionine in the reversal of nitrous oxide inhibition of formate oxidation in the rat. *Mol Pharmacol* 32:309-314, 1987
30. Lumb M, Deacon R, Perry J, Chanarin I: Oxidation of 5-methyltetrahydrofolate in cobalamin-inactivated rats. *Biochem J* 258: 907-910, 1989
31. Horne DW, Patterson D, Cook RJ: Effect of nitrous oxide inactivation of vitamin B<sub>12</sub>-dependent methionine synthase on the subcellular distribution of folate coenzymes in rat liver. *Arch Biochem Biophys* 270:729-733, 1989
32. Finkelstein JD, Kyle WE, Harris BJ: Methionine metabolism in mammals. Regulation of homocysteine methyltransferases in rat tissue. *Arch Biochem Biophys* 146:84-92, 1971
33. Barak AJ, Beckenhauer HC, Tuma DJ, Badakhsh S: Effects of prolonged ethanol feeding on methionine metabolism in rat liver. *Biochem Cell Biol* 65:230-233, 1987
34. Tamura T, Kaiser LL, Watson JE, Halsted CH, Hurley LS, Stokstad ELR: Increased methionine synthetase activity in zinc-deficient rat liver. *Arch Biochem Biophys* 256:311-316, 1987
35. Deacon R, Lumb M, Perry J, Chanarin I, Minty B, Halsey M, Nunn JF: Inactivation of methionine synthase by nitrous oxide. *Eur J Biochem* 104:419-422, 1980
36. Koblin DD, Tomerson BW: Methionine synthase activities in mice following acute exposures to ethanol and nitrous oxide. *Biochem Pharmacol* 38:1353-1358, 1989
37. Chanarin I: Cobalamins and nitrous oxide: A review. *J Clin Pathol* 33:909-916, 1980
38. Frasca V, Riazi BS, Matthews RG: *In vitro* inactivation of methionine synthase by nitrous oxide. *J Biol Chem* 261:15823-15826, 1986
39. Carl GF, Smith ML: Chronic carbamazepine treatment in the rat: Efficacy, toxicity, and effect on plasma and tissue folate concentrations. *Epilepsia* 30:217-224, 1989
40. Herbert V: Making sense of laboratory tests of folate status: Folate requirements to sustain normality. *Am J Hematol* 26:199-207, 1987
41. Scott JSD, Treston AM, Bowman EPW, Owens JA, Cooksley WGE: The regulatory roles of liver and kidney in cobalamin (vitamin B<sub>12</sub>) metabolism in the rat: The uptake and intracellular binding of cobalamin and the activity of the cobalamin-dependent enzymes in response to varying cobalamin supply. *Clin Sci* 67: 299-306, 1984
42. Bhatt HR, Linnell JC: Vitamin B<sub>12</sub> homeostasis after haemorrhage in the rat: The importance of skeletal muscle. *Clin Sci* 73:581-587, 1987
43. Johlin FC, Fortman CS, Nghiem DD, Tephly TR: Studies on the role of folic acid and folate-dependent enzymes in human methanol poisoning. *Mol Pharmacol* 31:557-561, 1987
44. Shane B, Stokstad ELR: Vitamin B<sub>12</sub>-Folate interrelationships. *Ann Rev Nutr* 5:115-141, 1985
